# Supplementary material for: Transfer learning-based English translation text classification in a multimedia network environment
Source: PeerJ journal article supplement (doi:10.7717/peerj-cs.1842), 2024-01-31
Supplement: data.zip [file data.zip]

## Sheet: Predict
id	anger	disgust	fear	joy	sad	surprise			anger	disgust	fear	joy	sad	surprise
1	0	0	0.0744	0.2727	0.0992	0.5537		r	1	1	1	1	1	1
2	0.0241	0	0.494	0.3012	0.0723	0.1084		average	1
3	0	0	0.1047	0.5698	0.0581	0.2674		evaluation	大吉大利 今晚吃鸡
4	0	0	0.4805	0.1299	0.2468	0.1429
5	0.1486	0.0135	0.0676	0.1081	0.473	0.1892
6	0	0	0	0.4167	0.1667	0.4167
7	0.1806	0.1097	0.4387	0	0.2452	0.0258
8	0	0.1026	0.0513	0.6667	0.1282	0.0513
9	0	0	0	0.4563	0	0.5437
10	0	0	0.8154	0	0.1385	0.0462
11	0.2075	0	0	0	0.0755	0.717
12	0.0354	0.115	0.2389	0	0.5752	0.0354
13	0.0968	0	0	0	0.9032	0
14	0.0375	0	0	0	0.875	0.0875
15	0	0.3226	0.0645	0.1935	0.0161	0.4032
16	0	0	0	0.6579	0	0.3421
17	0.0429	0.0429	0	0.7714	0	0.1429
18	0	0	0	0.8226	0	0.1774
19	0	0	0.4904	0	0.4038	0.1058
20	0.2614	0.2841	0	0	0.3182	0.1364
21	0.2402	0.2445	0.1747	0	0.2358	0.1048
22	0	0	0.0233	0.4651	0	0.5116
23	0.1209	0.022	0.1648	0	0.3956	0.2967
24	0.2404	0.071	0.1694	0	0.4481	0.071
25	0	0	0.0506	0.519	0.1139	0.3165
26	0	0	0.3836	0	0.2055	0.411
27	0.0224	0	0.306	0	0.5	0.1716
28	0	0	0	0.7882	0	0.2118
29	0.1064	0.1135	0.1277	0	0.6383	0.0142
30	0.1974	0	0.5592	0	0.2434	0
31	0.1064	0.0851	0.2411	0.0993	0.2482	0.2199
32	0.2266	0.1921	0.202	0	0.3793	0
33	0.1505	0.1667	0.371	0	0.3118	0
34	0.303	0.2727	0.0727	0.0848	0.1758	0.0909
35	0.2024	0.0952	0.2619	0.1607	0.1786	0.1012
36	0.3529	0.1765	0	0	0	0.4706
37	0	0.0759	0	0.7595	0	0.1646
38	0	0	0.1124	0.7079	0.1798	0
39	0.0242	0	0.1694	0	0.621	0.1855
40	0	0.0536	0.0893	0.1429	0.1964	0.5179
41	0	0	0	0.4937	0	0.5063
42	0.0588	0	0.1373	0.5	0.1569	0.1471
43	0.1947	0.0474	0.3	0	0.3474	0.1105
44	0.0763	0	0.2203	0	0.5085	0.1949
45	0	0.3333	0	0.6667	0	0
46	0.1946	0.0134	0.3624	0	0.2483	0.1812
47	0.102	0.068	0.1361	0	0.4354	0.2585
48	0.1228	0.1228	0.0877	0	0.1053	0.5614
49	0	0.08	0	0	0.8	0.12
50	0	0	0.4583	0	0.1771	0.3646
51	0	0	0	0.6667	0	0.3333
52	0	0	0	0.9032	0	0.0968
53	0	0	0.3636	0.2727	0.3636	0
54	0	0	0.0333	0.2833	0.5167	0.1667
55	0	0	0.0449	0.4831	0	0.4719
56	0.2095	0.2432	0	0.1892	0.223	0.1351
57	0.0211	0	0.1053	0.4947	0.1789	0.2
58	0.3936	0	0.1064	0.2128	0.1809	0.1064
59	0.1818	0.2364	0.3636	0	0.1818	0.0364
60	0.061	0.3171	0.061	0.1463	0.1341	0.2805
61	0	0	0	0.6022	0	0.3978
62	0.1429	0.1429	0	0	0	0.7143
63	0	0	0.1176	0.4706	0.4118	0
64	0	0.0294	0	0	0.0882	0.8824
65	0	0	0.1059	0.4118	0.0588	0.4235
66	0	0.0374	0.243	0.486	0.0841	0.1495
67	0	0	0.0233	0.5116	0	0.4651
68	0.0796	0	0.1416	0	0.6549	0.1239
69	0	0	0.4337	0.4217	0	0.1446
70	0	0	0	0.6339	0	0.3661
71	0.2	0	0	0	0.3	0.5
72	0	0.0175	0.0526	0	0.7193	0.2105
73	0	0	0	0	0.5	0.5
74	0	0	0	0.5714	0	0.4286
75	0	0	0.0404	0.6364	0	0.3232
76	0	0	0.4828	0	0.3103	0.2069
77	0.0849	0	0.4811	0	0.3585	0.0755
78	0.1233	0.1781	0.1781	0	0.2055	0.3151
79	0	0	0	0.75	0	0.25
80	0	0	0.2	0	0.6	0.2
81	0	0.1404	0.4035	0	0.4561	0
82	0.0244	0	0.0488	0.5854	0.0488	0.2927
83	0	0.0444	0	0.2444	0.0667	0.6444
84	0.0385	0	0.2179	0.5385	0.1538	0.0513
85	0.2222	0.6481	0	0.0741	0.0556	0
86	0.2451	0.1863	0.3039	0	0.2647	0
87	0.1507	0	0	0	0.5479	0.3014
88	0.3224	0.1118	0.0987	0	0.3553	0.1118
89	0	0	0.05	0.725	0.05	0.175
90	0.1356	0.0678	0.1441	0	0.4915	0.161
91	0.0244	0	0.0366	0.5732	0.0366	0.3293
92	0.0656	0	0.2295	0	0.2623	0.4426
93	0.7778	0	0	0.2222	0	0
94	0	0	0.169	0.6056	0	0.2254
95	0.219	0.3048	0	0.2	0.1476	0.1286
96	0	0	0.0444	0.6	0.0222	0.3333
97	0.1392	0.1013	0.2405	0.3544	0.0506	0.1139
98	0	0	0	0.7595	0.038	0.2025
99	0.0916	0.1527	0.1145	0.1374	0.4733	0.0305
100	0	0	0.1379	0.3793	0	0.4828
101	0.0397	0.0331	0.2715	0	0.5232	0.1325
102	0	0	0.0192	0.5962	0	0.3846
103	0	0	0.3625	0	0.5375	0.1
104	0	0	0.8025	0	0	0.1975
105	0	0	0	0.8431	0	0.1569
106	0.5393	0.0225	0.2472	0.0449	0.1461	0
107	0.1721	0	0.2131	0	0.6148	0
108	0	0	0.0206	0.3196	0	0.6598
109	0.0797	0.0145	0.3478	0.0507	0.2826	0.2246
110	0	0.1176	0	0.5882	0.0588	0.2353
111	0	0.1818	0.0202	0.2222	0	0.5758
112	0	0.1364	0	0	0.4091	0.4545
113	0.0328	0.5	0.2459	0.0656	0.1148	0.041
114	0.1571	0.05	0.25	0	0.5429	0
115	0.2967	0.2582	0.033	0	0.3242	0.0879
116	0.2134	0.0915	0.4634	0	0.2012	0.0305
117	0.1653	0.3884	0.1157	0	0.1488	0.1818
118	0	0	0.1639	0.541	0.0984	0.1967
119	0.2596	0.2308	0.3221	0	0.1875	0
120	0.2446	0.1223	0.223	0.1223	0.1151	0.1727
121	0	0	0	0.8056	0	0.1944
122	0	0	0.1571	0.2429	0	0.6
123	0.0455	0.0758	0.0152	0.1515	0.7121	0
124	0	0.2708	0.4792	0	0.1875	0.0625
125	0.0122	0	0.378	0	0.5488	0.061
126	0	0	0.3333	0.5	0	0.1667
127	0	0	0.2278	0.557	0.0759	0.1392
128	0	0.0175	0	0.386	0	0.5965
129	0	0	0	0.7931	0	0.2069
130	0	0	0	0.5556	0	0.4444
131	0.0789	0.3246	0.1228	0	0.2895	0.1842
132	0.2933	0.1133	0.1933	0.1067	0.1867	0.1067
133	0.272	0.152	0.232	0.016	0.136	0.192
134	0	0	0	0.7595	0	0.2405
135	0.0559	0.0186	0.1304	0	0.5714	0.2236
136	0.4706	0.0882	0	0	0.2941	0.1471
137	0.08	0	0.28	0	0.57	0.07
138	0.129	0.0452	0.2452	0	0.5613	0.0194
139	0	0	0	0.6923	0	0.3077
140	0.0294	0.1471	0.0882	0.4853	0.0735	0.1765
141	0.3462	0.1	0.1154	0.2077	0.1923	0.0385
142	0.0204	0	0.0306	0.5306	0.0408	0.3776
143	0.1943	0.2629	0.0857	0	0.2686	0.1886
144	0.2316	0.1368	0.3298	0	0.3018	0
145	0.3889	0	0	0	0.3889	0.2222
146	0	0.7857	0.2143	0	0	0
147	0	0	0	0.4167	0.125	0.4583
148	0.1017	0	0.2373	0.2034	0.1864	0.2712
149	0	0	0	0.7941	0	0.2059
150	0.3611	0.0417	0.4306	0	0	0.1667
151	0.211	0	0.4312	0	0.3578	0
152	0.2171	0.2326	0	0.2093	0.3411	0
153	0	0	0.1489	0.4468	0.0691	0.3351
154	0.2034	0	0.3729	0	0.4237	0
155	0	0	0	0.8866	0	0.1134
156	0	0	0.0889	0	0.5556	0.3556
157	0	0	0.125	0.5	0.1389	0.2361
158	0	0	0.05	0.125	0	0.825
159	0.3311	0.0743	0.3041	0.0541	0.2365	0
160	0	0	0	0.8919	0	0.1081
161	0.0508	0.0678	0.0847	0.4237	0.1695	0.2034
162	0	0	0	0.7568	0	0.2432
163	0	0	0	0.7818	0	0.2182
164	0	0	0.3118	0	0.5161	0.172
165	0.3662	0.1268	0.338	0	0.169	0
166	0	0.0435	0.1739	0.2826	0.087	0.413
167	0.1667	0	0.5435	0	0.2319	0.058
168	0.0185	0	0.1759	0.4259	0.0926	0.287
169	0.1275	0.047	0.4631	0	0.3087	0.0537
170	0	0	0	0.2456	0	0.7544
171	0	0	0	0.6814	0	0.3186
172	0	0	0.55	0	0.35	0.1
173	0.1698	0	0.6038	0.0377	0.1698	0.0189
174	0.0889	0.0667	0.2222	0	0.2889	0.3333
175	0.382	0.0225	0.2022	0.2022	0.191	0
176	0	0	0	0.6593	0	0.3407
177	0.2537	0.0896	0.2985	0	0.209	0.1493
178	0	0	0.701	0	0.2371	0.0619
179	0.0198	0	0.1485	0.6931	0.0099	0.1287
180	0	0	0.0476	0.5048	0.0286	0.419
181	0.2281	0.1842	0.3289	0	0.2588	0
182	0	0	0	0	0	1
183	0.1188	0	0.2438	0	0.5	0.1375
184	0	0	0	0.3571	0	0.6429
185	0	0	0.2368	0	0.7632	0
186	0.046	0.0575	0.069	0.5517	0.092	0.1839
187	0.6538	0	0.3077	0	0	0.0385
188	0	0	0	0.037	0.6481	0.3148
189	0	0.1228	0.193	0.1228	0.0702	0.4912
190	0.2339	0.2339	0.2661	0	0.2661	0
191	0.3182	0.1136	0.1364	0	0.2614	0.1705
192	0.0323	0	0	0.4	0.1032	0.4645
193	0	0	0	0.9	0	0.1
194	0	0	0	0.8667	0	0.1333
195	0.0292	0	0.3431	0	0.6204	0.0073
196	0	0	0	0.6923	0	0.3077
197	0.1964	0	0	0.25	0.5536	0
198	0	0	0	0.7606	0	0.2394
199	0	0	0	0.7241	0	0.2759
200	0	0	0	1	0	0
201	0.039	0.013	0.1688	0.2597	0.1818	0.3377
202	0	0	0.0308	0.1077	0.0615	0.8
203	0.2451	0.2353	0.0588	0.2059	0.1275	0.1275
204	0.0909	0.1212	0.0909	0.4242	0.0455	0.2273
205	0	0	0.0962	0.6346	0	0.2692
206	0.326	0.2265	0.0331	0	0.3425	0.0718
207	0	0	0	0.7761	0	0.2239
208	0	0	0	1	0	0
209	0	0	0	1	0	0
210	0.25	0.2188	0.0313	0.0313	0.4063	0.0625
211	0	0	0	1	0	0
212	0.1034	0	0.2931	0	0.3793	0.2241
213	0.084	0.0504	0.1176	0.3445	0.1429	0.2605
214	0	0	0.0444	0.1778	0.3556	0.4222
215	0.1652	0.1304	0.3652	0	0.2174	0.1217
216	0	0	0	0.7656	0	0.2344
217	0	0	0.1714	0.0571	0.6	0.1714
218	0.2849	0.0581	0.4535	0	0.0872	0.1163
219	0.3011	0	0.0323	0.3871	0	0.2796
220	0.3333	0.2083	0	0	0.3	0.1583
221	0.0357	0.0429	0.0857	0	0.5214	0.3143
222	0	0.1341	0	0.2073	0	0.6585
223	0	0	0	0.5678	0	0.4322
224	0	0.1264	0	0.1954	0	0.6782
225	0.2133	0.1801	0.3555	0	0.2512	0
226	0.2982	0.1228	0.4912	0.0351	0.0175	0.0351
227	0	0	0.0633	0.7468	0	0.1899
228	0	0	0	1	0	0
229	0.4839	0.5161	0	0	0	0
230	0	0	0.0244	0.7195	0.0244	0.2317
231	0	0	0.3556	0.1778	0.2	0.2667
232	0.1081	0.1261	0.1171	0.2793	0.2523	0.1171
233	0	0.0299	0.1194	0.5821	0.0448	0.2239
234	0	0	0	0.5606	0	0.4394
235	0.0941	0.0824	0.1412	0	0.6824	0
236	0	0	0.1739	0.4565	0.2391	0.1304
237	0	0	0.1628	0	0.6047	0.2326
238	0	0	0	0.5405	0	0.4595
239	0	0	0	0.7692	0	0.2308
240	0	0	0	0.8592	0	0.1408
241	0.1795	0.0641	0.2692	0	0.2308	0.2564
242	0	0	0	0.5918	0	0.4082
243	0.0909	0.2424	0.0303	0	0.6364	0
244	0	0	0.1978	0.6044	0.0659	0.1319
245	0	0	0	0.3125	0.3438	0.3438
246	0.1359	0.1165	0.3398	0	0.1748	0.233
247	0	0	0.4444	0.2333	0.1	0.2222
248	0.0204	0.1224	0.2653	0.3878	0.1327	0.0714
249	0	0	0	1	0	0
250	0	0	0	0.5181	0	0.4819
251	0.1756	0.0305	0.3511	0	0.3359	0.1069
252	0.0714	0.0238	0.5833	0	0.1548	0.1667
253	0	0	0	0.8148	0	0.1852
254	0.2992	0.0787	0.3858	0	0.2047	0.0315
255	0.0196	0	0.451	0.1569	0.2157	0.1569
256	0.0737	0.1053	0.1263	0.3579	0.1263	0.2105
257	0	0	0.0714	0.0286	0.7286	0.1714
258	0.1186	0.4915	0	0.0339	0	0.3559
259	0.1761	0.1831	0.0563	0	0.5845	0
260	0	0	0.0417	0.2778	0.1389	0.5417
261	0	0	0.1304	0	0.8261	0.0435
262	0.2222	0	0.3137	0	0.4641	0
263	0	0	0.075	0.45	0	0.475
264	0.026	0.1039	0.1299	0.2597	0.1688	0.3117
265	0.04	0.33	0.26	0	0.37	0
266	0.3871	0.0968	0.1613	0	0.2581	0.0968
267	0	0.1311	0	0	0.4426	0.4262
268	0	0	0	0.7843	0	0.2157
269	0	0	0	0.5974	0	0.4026
270	0	0	0	0.593	0	0.407
271	0	0	0	0.7288	0	0.2712
272	0.069	0.1954	0	0	0.4713	0.2644
273	0.1455	0.1455	0	0.6545	0.0545	0
274	0.0811	0.0541	0.5	0.1081	0.1622	0.0946
275	0.2342	0.057	0.5316	0	0.1646	0.0127
276	0.027	0	0.0541	0.5	0.0811	0.3378
277	0.0348	0	0.3826	0.0783	0.3391	0.1652
278	0.1892	0.1351	0.3243	0.027	0.0405	0.2838
279	0.0189	0	0	0.7925	0	0.1887
280	0	0	0.0556	0.4259	0.037	0.4815
281	0	0	0.7209	0	0.2791	0
282	0	0	0	0.7778	0	0.2222
283	0	0	0.3297	0.033	0.2527	0.3846
284	0.2424	0	0.0303	0.4848	0.0606	0.1818
285	0.3813	0.2	0.1438	0	0.275	0
286	0.1707	0.122	0.1016	0.0935	0.3293	0.1829
287	0	0	0	1	0	0
288	0	0	0.0263	0.4825	0	0.4912
289	0.1983	0.0248	0.438	0	0.2231	0.1157
290	0	0	0	0.2432	0.4324	0.3243
291	0	0	0	0.642	0	0.358
292	0	0.0303	0.0303	0.697	0	0.2424
293	0	0	0.1351	0.473	0.1351	0.2568
294	0	0	0	0.6	0	0.4
295	0.2857	0.0804	0.3571	0.0179	0.2411	0.0179
296	0.0808	0.0101	0.3939	0.1616	0.2222	0.1313
297	0	0	0	0.1714	0	0.8286
298	0	0	0.125	0.25	0.5313	0.0938
299	0	0	0.0652	0.7826	0	0.1522
300	0.0308	0.0308	0.1846	0.4462	0.1385	0.1692
301	0.0196	0.1569	0.0784	0.3137	0.1373	0.2941
302	0	0	0.7011	0	0.1724	0.1264
303	0.0147	0	0.0735	0.6912	0.0588	0.1618
304	0	0	0.2593	0	0.2963	0.4444
305	0.3333	0.3333	0	0	0	0.3333
306	0.2629	0.3429	0.0343	0	0.2457	0.1143
307	0	0	0	1	0	0
308	0.2844	0.0826	0.1376	0.1284	0.2385	0.1284
309	0	0	0	0.8462	0.0769	0.0769
310	0.1034	0.3103	0.1207	0	0.2069	0.2586
311	0.0769	0	0.641	0	0.2821	0

## Sheet: Standard
id	anger	disgust	fear	joy	sad	surprise
1	0	0	0.0744	0.2727	0.0992	0.5537
2	0.0241	0	0.494	0.3012	0.0723	0.1084
3	0	0	0.1047	0.5698	0.0581	0.2674
4	0	0	0.4805	0.1299	0.2468	0.1429
5	0.1486	0.0135	0.0676	0.1081	0.473	0.1892
6	0	0	0	0.4167	0.1667	0.4167
7	0.1806	0.1097	0.4387	0	0.2452	0.0258
8	0	0.1026	0.0513	0.6667	0.1282	0.0513
9	0	0	0	0.4563	0	0.5437
10	0	0	0.8154	0	0.1385	0.0462
11	0.2075	0	0	0	0.0755	0.717
12	0.0354	0.115	0.2389	0	0.5752	0.0354
13	0.0968	0	0	0	0.9032	0
14	0.0375	0	0	0	0.875	0.0875
15	0	0.3226	0.0645	0.1935	0.0161	0.4032
16	0	0	0	0.6579	0	0.3421
17	0.0429	0.0429	0	0.7714	0	0.1429
18	0	0	0	0.8226	0	0.1774
19	0	0	0.4904	0	0.4038	0.1058
20	0.2614	0.2841	0	0	0.3182	0.1364
21	0.2402	0.2445	0.1747	0	0.2358	0.1048
22	0	0	0.0233	0.4651	0	0.5116
23	0.1209	0.022	0.1648	0	0.3956	0.2967
24	0.2404	0.071	0.1694	0	0.4481	0.071
25	0	0	0.0506	0.519	0.1139	0.3165
26	0	0	0.3836	0	0.2055	0.411
27	0.0224	0	0.306	0	0.5	0.1716
28	0	0	0	0.7882	0	0.2118
29	0.1064	0.1135	0.1277	0	0.6383	0.0142
30	0.1974	0	0.5592	0	0.2434	0
31	0.1064	0.0851	0.2411	0.0993	0.2482	0.2199
32	0.2266	0.1921	0.202	0	0.3793	0
33	0.1505	0.1667	0.371	0	0.3118	0
34	0.303	0.2727	0.0727	0.0848	0.1758	0.0909
35	0.2024	0.0952	0.2619	0.1607	0.1786	0.1012
36	0.3529	0.1765	0	0	0	0.4706
37	0	0.0759	0	0.7595	0	0.1646
38	0	0	0.1124	0.7079	0.1798	0
39	0.0242	0	0.1694	0	0.621	0.1855
40	0	0.0536	0.0893	0.1429	0.1964	0.5179
41	0	0	0	0.4937	0	0.5063
42	0.0588	0	0.1373	0.5	0.1569	0.1471
43	0.1947	0.0474	0.3	0	0.3474	0.1105
44	0.0763	0	0.2203	0	0.5085	0.1949
45	0	0.3333	0	0.6667	0	0
46	0.1946	0.0134	0.3624	0	0.2483	0.1812
47	0.102	0.068	0.1361	0	0.4354	0.2585
48	0.1228	0.1228	0.0877	0	0.1053	0.5614
49	0	0.08	0	0	0.8	0.12
50	0	0	0.4583	0	0.1771	0.3646
51	0	0	0	0.6667	0	0.3333
52	0	0	0	0.9032	0	0.0968
53	0	0	0.3636	0.2727	0.3636	0
54	0	0	0.0333	0.2833	0.5167	0.1667
55	0	0	0.0449	0.4831	0	0.4719
56	0.2095	0.2432	0	0.1892	0.223	0.1351
57	0.0211	0	0.1053	0.4947	0.1789	0.2
58	0.3936	0	0.1064	0.2128	0.1809	0.1064
59	0.1818	0.2364	0.3636	0	0.1818	0.0364
60	0.061	0.3171	0.061	0.1463	0.1341	0.2805
61	0	0	0	0.6022	0	0.3978
62	0.1429	0.1429	0	0	0	0.7143
63	0	0	0.1176	0.4706	0.4118	0
64	0	0.0294	0	0	0.0882	0.8824
65	0	0	0.1059	0.4118	0.0588	0.4235
66	0	0.0374	0.243	0.486	0.0841	0.1495
67	0	0	0.0233	0.5116	0	0.4651
68	0.0796	0	0.1416	0	0.6549	0.1239
69	0	0	0.4337	0.4217	0	0.1446
70	0	0	0	0.6339	0	0.3661
71	0.2	0	0	0	0.3	0.5
72	0	0.0175	0.0526	0	0.7193	0.2105
73	0	0	0	0	0.5	0.5
74	0	0	0	0.5714	0	0.4286
75	0	0	0.0404	0.6364	0	0.3232
76	0	0	0.4828	0	0.3103	0.2069
77	0.0849	0	0.4811	0	0.3585	0.0755
78	0.1233	0.1781	0.1781	0	0.2055	0.3151
79	0	0	0	0.75	0	0.25
80	0	0	0.2	0	0.6	0.2
81	0	0.1404	0.4035	0	0.4561	0
82	0.0244	0	0.0488	0.5854	0.0488	0.2927
83	0	0.0444	0	0.2444	0.0667	0.6444
84	0.0385	0	0.2179	0.5385	0.1538	0.0513
85	0.2222	0.6481	0	0.0741	0.0556	0
86	0.2451	0.1863	0.3039	0	0.2647	0
87	0.1507	0	0	0	0.5479	0.3014
88	0.3224	0.1118	0.0987	0	0.3553	0.1118
89	0	0	0.05	0.725	0.05	0.175
90	0.1356	0.0678	0.1441	0	0.4915	0.161
91	0.0244	0	0.0366	0.5732	0.0366	0.3293
92	0.0656	0	0.2295	0	0.2623	0.4426
93	0.7778	0	0	0.2222	0	0
94	0	0	0.169	0.6056	0	0.2254
95	0.219	0.3048	0	0.2	0.1476	0.1286
96	0	0	0.0444	0.6	0.0222	0.3333
97	0.1392	0.1013	0.2405	0.3544	0.0506	0.1139
98	0	0	0	0.7595	0.038	0.2025
99	0.0916	0.1527	0.1145	0.1374	0.4733	0.0305
100	0	0	0.1379	0.3793	0	0.4828
101	0.0397	0.0331	0.2715	0	0.5232	0.1325
102	0	0	0.0192	0.5962	0	0.3846
103	0	0	0.3625	0	0.5375	0.1
104	0	0	0.8025	0	0	0.1975
105	0	0	0	0.8431	0	0.1569
106	0.5393	0.0225	0.2472	0.0449	0.1461	0
107	0.1721	0	0.2131	0	0.6148	0
108	0	0	0.0206	0.3196	0	0.6598
109	0.0797	0.0145	0.3478	0.0507	0.2826	0.2246
110	0	0.1176	0	0.5882	0.0588	0.2353
111	0	0.1818	0.0202	0.2222	0	0.5758
112	0	0.1364	0	0	0.4091	0.4545
113	0.0328	0.5	0.2459	0.0656	0.1148	0.041
114	0.1571	0.05	0.25	0	0.5429	0
115	0.2967	0.2582	0.033	0	0.3242	0.0879
116	0.2134	0.0915	0.4634	0	0.2012	0.0305
117	0.1653	0.3884	0.1157	0	0.1488	0.1818
118	0	0	0.1639	0.541	0.0984	0.1967
119	0.2596	0.2308	0.3221	0	0.1875	0
120	0.2446	0.1223	0.223	0.1223	0.1151	0.1727
121	0	0	0	0.8056	0	0.1944
122	0	0	0.1571	0.2429	0	0.6
123	0.0455	0.0758	0.0152	0.1515	0.7121	0
124	0	0.2708	0.4792	0	0.1875	0.0625
125	0.0122	0	0.378	0	0.5488	0.061
126	0	0	0.3333	0.5	0	0.1667
127	0	0	0.2278	0.557	0.0759	0.1392
128	0	0.0175	0	0.386	0	0.5965
129	0	0	0	0.7931	0	0.2069
130	0	0	0	0.5556	0	0.4444
131	0.0789	0.3246	0.1228	0	0.2895	0.1842
132	0.2933	0.1133	0.1933	0.1067	0.1867	0.1067
133	0.272	0.152	0.232	0.016	0.136	0.192
134	0	0	0	0.7595	0	0.2405
135	0.0559	0.0186	0.1304	0	0.5714	0.2236
136	0.4706	0.0882	0	0	0.2941	0.1471
137	0.08	0	0.28	0	0.57	0.07
138	0.129	0.0452	0.2452	0	0.5613	0.0194
139	0	0	0	0.6923	0	0.3077
140	0.0294	0.1471	0.0882	0.4853	0.0735	0.1765
141	0.3462	0.1	0.1154	0.2077	0.1923	0.0385
142	0.0204	0	0.0306	0.5306	0.0408	0.3776
143	0.1943	0.2629	0.0857	0	0.2686	0.1886
144	0.2316	0.1368	0.3298	0	0.3018	0
145	0.3889	0	0	0	0.3889	0.2222
146	0	0.7857	0.2143	0	0	0
147	0	0	0	0.4167	0.125	0.4583
148	0.1017	0	0.2373	0.2034	0.1864	0.2712
149	0	0	0	0.7941	0	0.2059
150	0.3611	0.0417	0.4306	0	0	0.1667
151	0.211	0	0.4312	0	0.3578	0
152	0.2171	0.2326	0	0.2093	0.3411	0
153	0	0	0.1489	0.4468	0.0691	0.3351
154	0.2034	0	0.3729	0	0.4237	0
155	0	0	0	0.8866	0	0.1134
156	0	0	0.0889	0	0.5556	0.3556
157	0	0	0.125	0.5	0.1389	0.2361
158	0	0	0.05	0.125	0	0.825
159	0.3311	0.0743	0.3041	0.0541	0.2365	0
160	0	0	0	0.8919	0	0.1081
161	0.0508	0.0678	0.0847	0.4237	0.1695	0.2034
162	0	0	0	0.7568	0	0.2432
163	0	0	0	0.7818	0	0.2182
164	0	0	0.3118	0	0.5161	0.172
165	0.3662	0.1268	0.338	0	0.169	0
166	0	0.0435	0.1739	0.2826	0.087	0.413
167	0.1667	0	0.5435	0	0.2319	0.058
168	0.0185	0	0.1759	0.4259	0.0926	0.287
169	0.1275	0.047	0.4631	0	0.3087	0.0537
170	0	0	0	0.2456	0	0.7544
171	0	0	0	0.6814	0	0.3186
172	0	0	0.55	0	0.35	0.1
173	0.1698	0	0.6038	0.0377	0.1698	0.0189
174	0.0889	0.0667	0.2222	0	0.2889	0.3333
175	0.382	0.0225	0.2022	0.2022	0.191	0
176	0	0	0	0.6593	0	0.3407
177	0.2537	0.0896	0.2985	0	0.209	0.1493
178	0	0	0.701	0	0.2371	0.0619
179	0.0198	0	0.1485	0.6931	0.0099	0.1287
180	0	0	0.0476	0.5048	0.0286	0.419
181	0.2281	0.1842	0.3289	0	0.2588	0
182	0	0	0	0	0	1
183	0.1188	0	0.2438	0	0.5	0.1375
184	0	0	0	0.3571	0	0.6429
185	0	0	0.2368	0	0.7632	0
186	0.046	0.0575	0.069	0.5517	0.092	0.1839
187	0.6538	0	0.3077	0	0	0.0385
188	0	0	0	0.037	0.6481	0.3148
189	0	0.1228	0.193	0.1228	0.0702	0.4912
190	0.2339	0.2339	0.2661	0	0.2661	0
191	0.3182	0.1136	0.1364	0	0.2614	0.1705
192	0.0323	0	0	0.4	0.1032	0.4645
193	0	0	0	0.9	0	0.1
194	0	0	0	0.8667	0	0.1333
195	0.0292	0	0.3431	0	0.6204	0.0073
196	0	0	0	0.6923	0	0.3077
197	0.1964	0	0	0.25	0.5536	0
198	0	0	0	0.7606	0	0.2394
199	0	0	0	0.7241	0	0.2759
200	0	0	0	1	0	0
201	0.039	0.013	0.1688	0.2597	0.1818	0.3377
202	0	0	0.0308	0.1077	0.0615	0.8
203	0.2451	0.2353	0.0588	0.2059	0.1275	0.1275
204	0.0909	0.1212	0.0909	0.4242	0.0455	0.2273
205	0	0	0.0962	0.6346	0	0.2692
206	0.326	0.2265	0.0331	0	0.3425	0.0718
207	0	0	0	0.7761	0	0.2239
208	0	0	0	1	0	0
209	0	0	0	1	0	0
210	0.25	0.2188	0.0313	0.0313	0.4063	0.0625
211	0	0	0	1	0	0
212	0.1034	0	0.2931	0	0.3793	0.2241
213	0.084	0.0504	0.1176	0.3445	0.1429	0.2605
214	0	0	0.0444	0.1778	0.3556	0.4222
215	0.1652	0.1304	0.3652	0	0.2174	0.1217
216	0	0	0	0.7656	0	0.2344
217	0	0	0.1714	0.0571	0.6	0.1714
218	0.2849	0.0581	0.4535	0	0.0872	0.1163
219	0.3011	0	0.0323	0.3871	0	0.2796
220	0.3333	0.2083	0	0	0.3	0.1583
221	0.0357	0.0429	0.0857	0	0.5214	0.3143
222	0	0.1341	0	0.2073	0	0.6585
223	0	0	0	0.5678	0	0.4322
224	0	0.1264	0	0.1954	0	0.6782
225	0.2133	0.1801	0.3555	0	0.2512	0
226	0.2982	0.1228	0.4912	0.0351	0.0175	0.0351
227	0	0	0.0633	0.7468	0	0.1899
228	0	0	0	1	0	0
229	0.4839	0.5161	0	0	0	0
230	0	0	0.0244	0.7195	0.0244	0.2317
231	0	0	0.3556	0.1778	0.2	0.2667
232	0.1081	0.1261	0.1171	0.2793	0.2523	0.1171
233	0	0.0299	0.1194	0.5821	0.0448	0.2239
234	0	0	0	0.5606	0	0.4394
235	0.0941	0.0824	0.1412	0	0.6824	0
236	0	0	0.1739	0.4565	0.2391	0.1304
237	0	0	0.1628	0	0.6047	0.2326
238	0	0	0	0.5405	0	0.4595
239	0	0	0	0.7692	0	0.2308
240	0	0	0	0.8592	0	0.1408
241	0.1795	0.0641	0.2692	0	0.2308	0.2564
242	0	0	0	0.5918	0	0.4082
243	0.0909	0.2424	0.0303	0	0.6364	0
244	0	0	0.1978	0.6044	0.0659	0.1319
245	0	0	0	0.3125	0.3438	0.3438
246	0.1359	0.1165	0.3398	0	0.1748	0.233
247	0	0	0.4444	0.2333	0.1	0.2222
248	0.0204	0.1224	0.2653	0.3878	0.1327	0.0714
249	0	0	0	1	0	0
250	0	0	0	0.5181	0	0.4819
251	0.1756	0.0305	0.3511	0	0.3359	0.1069
252	0.0714	0.0238	0.5833	0	0.1548	0.1667
253	0	0	0	0.8148	0	0.1852
254	0.2992	0.0787	0.3858	0	0.2047	0.0315
255	0.0196	0	0.451	0.1569	0.2157	0.1569
256	0.0737	0.1053	0.1263	0.3579	0.1263	0.2105
257	0	0	0.0714	0.0286	0.7286	0.1714
258	0.1186	0.4915	0	0.0339	0	0.3559
259	0.1761	0.1831	0.0563	0	0.5845	0
260	0	0	0.0417	0.2778	0.1389	0.5417
261	0	0	0.1304	0	0.8261	0.0435
262	0.2222	0	0.3137	0	0.4641	0
263	0	0	0.075	0.45	0	0.475
264	0.026	0.1039	0.1299	0.2597	0.1688	0.3117
265	0.04	0.33	0.26	0	0.37	0
266	0.3871	0.0968	0.1613	0	0.2581	0.0968
267	0	0.1311	0	0	0.4426	0.4262
268	0	0	0	0.7843	0	0.2157
269	0	0	0	0.5974	0	0.4026
270	0	0	0	0.593	0	0.407
271	0	0	0	0.7288	0	0.2712
272	0.069	0.1954	0	0	0.4713	0.2644
273	0.1455	0.1455	0	0.6545	0.0545	0
274	0.0811	0.0541	0.5	0.1081	0.1622	0.0946
275	0.2342	0.057	0.5316	0	0.1646	0.0127
276	0.027	0	0.0541	0.5	0.0811	0.3378
277	0.0348	0	0.3826	0.0783	0.3391	0.1652
278	0.1892	0.1351	0.3243	0.027	0.0405	0.2838
279	0.0189	0	0	0.7925	0	0.1887
280	0	0	0.0556	0.4259	0.037	0.4815
281	0	0	0.7209	0	0.2791	0
282	0	0	0	0.7778	0	0.2222
283	0	0	0.3297	0.033	0.2527	0.3846
284	0.2424	0	0.0303	0.4848	0.0606	0.1818
285	0.3813	0.2	0.1438	0	0.275	0
286	0.1707	0.122	0.1016	0.0935	0.3293	0.1829
287	0	0	0	1	0	0
288	0	0	0.0263	0.4825	0	0.4912
289	0.1983	0.0248	0.438	0	0.2231	0.1157
290	0	0	0	0.2432	0.4324	0.3243
291	0	0	0	0.642	0	0.358
292	0	0.0303	0.0303	0.697	0	0.2424
293	0	0	0.1351	0.473	0.1351	0.2568
294	0	0	0	0.6	0	0.4
295	0.2857	0.0804	0.3571	0.0179	0.2411	0.0179
296	0.0808	0.0101	0.3939	0.1616	0.2222	0.1313
297	0	0	0	0.1714	0	0.8286
298	0	0	0.125	0.25	0.5313	0.0938
299	0	0	0.0652	0.7826	0	0.1522
300	0.0308	0.0308	0.1846	0.4462	0.1385	0.1692
301	0.0196	0.1569	0.0784	0.3137	0.1373	0.2941
302	0	0	0.7011	0	0.1724	0.1264
303	0.0147	0	0.0735	0.6912	0.0588	0.1618
304	0	0	0.2593	0	0.2963	0.4444
305	0.3333	0.3333	0	0	0	0.3333
306	0.2629	0.3429	0.0343	0	0.2457	0.1143
307	0	0	0	1	0	0
308	0.2844	0.0826	0.1376	0.1284	0.2385	0.1284
309	0	0	0	0.8462	0.0769	0.0769
310	0.1034	0.3103	0.1207	0	0.2069	0.2586
311	0.0769	0	0.641	0	0.2821	0
